# Supplementary material for: Sensing Magnetic Field and Intermolecular Interactions in Diamagnetic Solution Using Residual Dipolar Couplings of Zephycandidine
Source: MDPI journal article supplement (doi:10.3390/ijms232315118), 2022-12-01
Supplement: s1 [file s1]

**Table S1. Comparison of solvent properties and their deuterated equivalents. The values given in bold were selected for the analyses described in the manuscript.**

|          | Solvent                                   | Molar volume                                              | Boiling point                                          | Refractive index             | Dielectric constant | Electric dipole moment  |                                                                    | Volume magnetic susceptibility in air at normal pressure | Volume magnetic susceptibility |
|----------|-------------------------------------------|-----------------------------------------------------------|--------------------------------------------------------|------------------------------|---------------------|-------------------------|--------------------------------------------------------------------|----------------------------------------------------------|--------------------------------|
|          |                                           | MV                                                        | t <sub>BP</sub>                                        | n <sub>D</sub> <sup>20</sup> | ε                   | ρ                       |                                                                    | χ <sub>sol</sub>                                         | χ <sub>sol</sub>               |
|          |                                           | cm <sup>3</sup> /mol                                      | °C                                                     |                              |                     | Cm                      | Debye                                                              | ppm                                                      | ppm                            |
| aromatic | benzene                                   | 89.4                                                      | 80.1                                                   | 1.5011                       | 2.27                | 0.0 x10 <sup>-30</sup>  | <b>0.000</b>                                                       |                                                          |                                |
|          | benzene- <i>d</i> <sub>6</sub>            | <b>88.6</b>                                               | 79.1                                                   | <b>1.4986</b>                | 2.3                 |                         |                                                                    | <b>-7.37</b>                                             | -7.56                          |
|          | toluene                                   | 106.8                                                     | 110.6                                                  | 1.4969                       | 2.38                | 1.0 x10 <sup>-30</sup>  | <b>0.300</b>                                                       |                                                          |                                |
|          | toluene- <i>d</i> <sub>8</sub>            | <b>106.6</b>                                              | 109.0                                                  | <b>1.493</b>                 | 2.4                 |                         |                                                                    | <b>-7.90</b>                                             | -8.01                          |
| protic   | acetic acid                               | 57.1                                                      | 117.9                                                  | 1.3719                       | 6.17                | 5.6 x10 <sup>-30</sup>  | <b>1.679</b>                                                       |                                                          | <b>-6.66</b>                   |
|          | acetic acid- <i>d</i> <sub>4</sub>        | <b>57.3</b>                                               | 115.5                                                  | <b>1.368</b>                 | 6.1                 |                         |                                                                    |                                                          |                                |
|          | methanol                                  | 40.7                                                      | 64.5                                                   | 1.3284                       | 32.66               | 5.9 x10 <sup>-30</sup>  | <b>1.769</b>                                                       |                                                          |                                |
|          | methanol- <i>d</i> <sub>4</sub>           | <b>40.5</b>                                               | 65.0                                                   | <b>1.3256</b>                | 32.7                |                         |                                                                    | <b>-6.69</b>                                             | -6.79                          |
|          | ethanol                                   | 58.5                                                      | 78.3                                                   | 1.3614                       | 24.55               | 5.8 x10 <sup>-30</sup>  | <b>1.739</b>                                                       |                                                          |                                |
|          | ethanol- <i>d</i> <sub>6</sub>            | <b>58.7</b>                                               | 78.0                                                   | <b>1.358</b>                 | 24.5                |                         |                                                                    |                                                          | <b>-7.29</b>                   |
| aprotic  | dimethyl sulfoxide                        | 71.3                                                      | 189.0                                                  | 1.4793                       | 46.45               | 13.5 x10 <sup>-30</sup> | <b>4.047</b>                                                       |                                                          |                                |
|          | dimethyl sulfoxide- <i>d</i> <sub>6</sub> | <b>70.7</b>                                               | 190.0                                                  | <b>1.4758</b>                | 46.7                |                         |                                                                    | <b>-7.80</b>                                             | -7.83                          |
|          | acetone                                   | 74.0                                                      | 56.1                                                   | 1.3587                       | 20.56               | 9.0 x10 <sup>-30</sup>  | <b>2.698</b>                                                       |                                                          |                                |
|          | acetone- <i>d</i> <sub>6</sub>            | <b>73.5</b>                                               | 55.5                                                   | <b>1.3554</b>                | 20.7                |                         |                                                                    | <b>-5.70</b>                                             | -5.78                          |
|          | tetrahydrofuran                           | 81.7                                                      | 66.0                                                   | 1.4072                       | 7.58                | 5.8 x10 <sup>-30</sup>  | <b>1.739</b>                                                       |                                                          |                                |
|          | tetrahydrofuran- <i>d</i> <sub>8</sub>    | <b>81.0</b>                                               | 64.0                                                   | <b>1.4035</b>                | 7.6                 |                         |                                                                    | <b>-7.96</b>                                             | -8.08                          |
|          | acetonitrile                              | 52.6                                                      | 81.6                                                   | 1.3441                       | 35.94               | 13.0 x10 <sup>-30</sup> | <b>3.897</b>                                                       |                                                          |                                |
|          | acetonitrile- <i>d</i> <sub>3</sub>       | <b>52.2</b>                                               | 80.7                                                   | <b>1.3406</b>                | 37.5                |                         |                                                                    | <b>-6.65</b>                                             | -6.76                          |
|          | chloroform                                | 80.7                                                      | 61.2                                                   | 1.4459                       | 4.89                | 3.8 x10 <sup>-30</sup>  | <b>1.466</b>                                                       |                                                          |                                |
|          | chloroform- <i>d</i>                      | <b>80.3</b>                                               | 60.9                                                   | 1.4445                       | 4.8                 |                         |                                                                    | <b>-9.24</b>                                             | -9.07                          |
|          | Data references:                          | protonated solvents - [48];<br>deuterated solvents - [63] | protonated solvents - [62]; deuterated solvents - [63] |                              |                     |                         | deuterated solvents - [38]; acetic acid - [59, 60]; ethanol - [61] |                                                          |                                |

Units conversion for Electric dipole moment:  $\rho$  [C m] = 3.336x10<sup>-30</sup> \*  $\rho$  [Debye]

**Table S2. Comparison of both experimental and estimated values of cohesive energy density (ced) from various literature sources. The values given in bold were selected for the analyses described in the manuscript.**

|           |                    | experimental         |                    | experimental         |                    | experimental         |                    | experimental |                    | literature average   |                    | empirical estimated with some experimental confirmation |                    |                    |                    |
|-----------|--------------------|----------------------|--------------------|----------------------|--------------------|----------------------|--------------------|--------------|--------------------|----------------------|--------------------|---------------------------------------------------------|--------------------|--------------------|--------------------|
| Reference |                    | [33]                 |                    | [39]                 |                    | [44]                 |                    | [45]         |                    | [43]                 |                    | [48]                                                    |                    |                    |                    |
|           |                    |                      |                    |                      |                    |                      |                    |              |                    |                      |                    | Total                                                   | Polar              | Dispersion         | Hydrogen Bond      |
|           |                    | cal cm <sup>-3</sup> | J cm <sup>-3</sup> | cal cm <sup>-3</sup> | J cm <sup>-3</sup> | cal cm <sup>-3</sup> | J cm <sup>-3</sup> | kBar         | J cm <sup>-3</sup> | cal cm <sup>-3</sup> | J cm <sup>-3</sup> | J cm <sup>-3</sup>                                      | J cm <sup>-3</sup> | J cm <sup>-3</sup> | J cm <sup>-3</sup> |
| aromatic  | benzene            | 83.7                 | 350                | 85.0                 | <b>356</b>         |                      |                    |              |                    | 83.7                 | 350                | 343                                                     | <b>0</b>           | <b>339</b>         | <b>4</b>           |
|           | toluene            | 79.4                 | 332                | 79.2                 | <b>331</b>         | 78.9                 | 330                |              |                    | 79.9                 | 334                | 330                                                     | <b>2</b>           | <b>324</b>         | <b>4</b>           |
| protic    | acetic acid        |                      |                    | 102.0                | <b>427</b>         |                      |                    |              |                    | 107.1                | 448                | 457                                                     | <b>64</b>          | <b>210</b>         | <b>182</b>         |
|           | methanol           | 208.8                | 874                | 210.3                | <b>880</b>         | 211.7                | 886                |              |                    | 204.5                | 856                | 877                                                     | <b>151</b>         | <b>228</b>         | <b>497</b>         |
|           | ethanol            | 161.3                | 675                | 161.3                | <b>675</b>         |                      |                    |              |                    | 166.9                | 698                | 703                                                     | <b>77</b>          | <b>250</b>         | <b>376</b>         |
| aprotic   | dimethyl sulfoxide | 168.6                | 705                | 144.0                | <b>603</b>         |                      |                    |              |                    | 210.3                | 880                | 712                                                     | <b>269</b>         | <b>339</b>         | <b>104</b>         |
|           | acetone            | 94.3                 | 395                | 98.0                 | <b>410</b>         | 95.8                 | 401                |              |                    | 95.5                 | 399                | 397                                                     | <b>108</b>         | <b>240</b>         | <b>49</b>          |
|           | tetrahydrofuran    | 86.9                 | 364                | 82.8                 | <b>346</b>         | 87.4                 | 366                |              |                    | 82.8                 | 347                | 379                                                     | <b>282</b>         | <b>32</b>          | <b>64</b>          |
|           | acetonitrile       | 139.2                | 582                | 141.6                | <b>593</b>         |                      |                    |              |                    | 142.1                | 595                | 595                                                     | <b>324</b>         | <b>234</b>         | <b>37</b>          |
|           | chloroform         | 85.4                 | 357                | 86.5                 | <b>362</b>         |                      |                    | 3.61         | 361                |                      |                    | 359                                                     | <b>10</b>          | <b>317</b>         | <b>32</b>          |

Units conversion for ced:  $\text{ced} [\text{J cm}^{-3}] = \text{ced} [\text{MPa}] = 4.1840 * \text{ced} [\text{cal cm}^{-3}] = 4.1840 * \delta^2 [\text{cal}^{0.5} \text{cm}^{-1.5}] = 100 * \text{ced} [\text{kBar}]$

$$\text{ced} [\text{MPa}] = (\delta_D^2 [\text{MPa}^{0.5}] + \delta_P^2 [\text{MPa}^{0.5}] + \delta_H^2 [\text{MPa}^{0.5}])$$

**Table S3. The values of ced for acetic acid from various sources.**

|                                            | ced                  | ced                | technique                 | enthalpy | process                      | Reference |
|--------------------------------------------|----------------------|--------------------|---------------------------|----------|------------------------------|-----------|
|                                            | cal cm <sup>-3</sup> | J cm <sup>-3</sup> |                           | kJ/mol   |                              |           |
| experimental                               | 102.0                | 427                | vapor pressure            |          |                              | [39]      |
| literature average                         | 107.1                | 448                |                           |          |                              | [43]      |
| empirical estimate                         |                      | 457                |                           |          |                              | [48]      |
| from experimental enthalpy of vaporization | 165.2                | 691                | vapor pressure            | 42.0     |                              | [47]      |
|                                            | 87.2                 | 365                | calorimetric measurements | 23.4     | liquid to gas at equilibrium | [46]      |
|                                            | 205.1                | 858                | calorimetric measurements | 51.6     | liquid to monomer gas        | [46]      |

Estimate of ced from enthalpy of vaporization:

$$\text{ced} [\text{J cm}^{-3}] = 4.1840 * \text{ced} [\text{cal cm}^{-3}] = (\Delta H_{\text{vap}} [\text{J mol}^{-1}] - R [\text{J mol}^{-1} \text{K}^{-1}] T [\text{K}]) * MV^{-1} [\text{cm}^{-3} \text{mol}^{-1}]$$

**Figure S1. (a) Temperature dependence of the quadrupolar splitting in the deuterium spectrum of benzene- $d_6$ . (b) The  $^{13}\text{C}$  satellite signals in the deuterium spectrum of benzene- $d_6$  used to estimate quadrupolar splitting in (a). Red dotted lines represent simulations.**

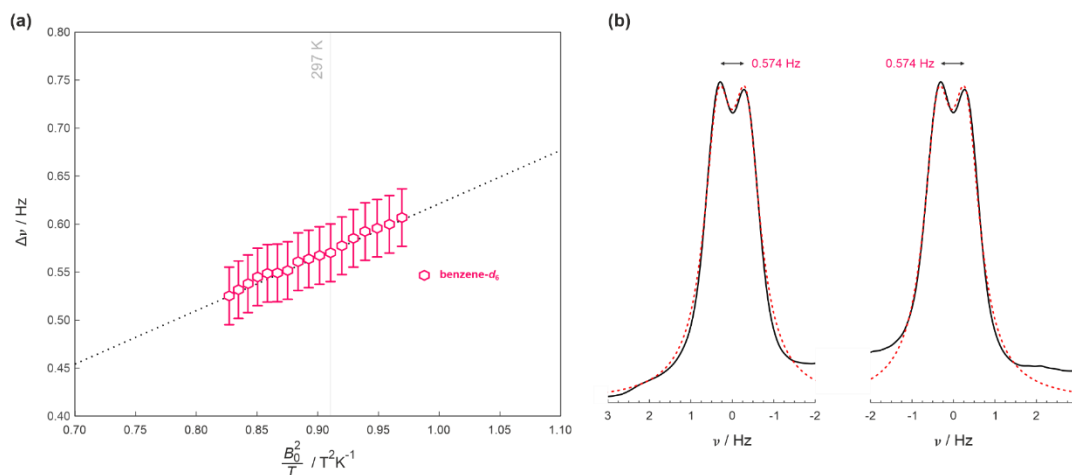

#### **The detailed step-by-step description of the procedure to estimate energy barrier:**

**Step 1.** From the magnetic field dependence (equation (2) in the manuscript) at constant room temperature (i.e., 297K), the value of the magnetic anisotropy  $\Delta\chi_{\text{ax}}$  for each solvent is known (listed in Table 1 of the manuscript). Therefore, at a constant magnetic field of 16.445 T (700 MHz NMR spectrometer), the “predicted” splitting  $\Delta\nu$  can be calculated for other temperatures at that magnetic field from the same equation (2).

**Step 2.** The natural logarithm of “predicted” splitting  $\ln(\Delta\nu)$  as function of the inverse of temperature ( $T^{-1}$ ) can be fitted to the Arrhenius equation (dotted lines in Figure 5(b) in the manuscript). From the fit the energy required for the reorientation in the given solvent can be extracted.

**Step 3.** The natural logarithm of the experimentally measured (at 700 MHz) splitting  $\ln(\Delta\nu)$  as function of the inverse of temperature ( $T^{-1}$ ) can be fitted to the Arrhenius equation (experimental points in Figure 5(b) in the manuscript). From the fit the additional energy required for reorientation can be extracted.

**Step 4.** The difference in the energies above is called the energy barrier  $\Delta E$ .

## References:

- [33] Dack, M.R.J. The importance of solvent internal pressure and cohesion to solution phenomena. *Chem. Soc. Rev.* 1975, 4, 211-229.
- [38] Hoffman, R.E. Magnetic susceptibility measurement by NMR: 2. The magnetic susceptibility of NMR solvents and their chemical shifts. *J. Magn. Reson.* 2022, 335, 107105.
- [39] Barton, A.F.M Solubility parameters, *Chem. Rev* 1975, 75, 731-753.
- [43] Belmares, M.; Blanco, M.; Goddard III, W.A.; Ross, R.B.; Caldwell, G.; Chou, S.-H.; Pham, J.; Olofson, P.M.; Thomas, C. Hildebrand and Hansen Solubility Parameters from Molecular dynamics with application to electronic nose polymer sensors. *J. Comput. Chem.* 2004, 25, 1814-1826
- [44] D'Amelia, R.P.; Tomic, J.C.; Nirode, W.F. The determination of the solubility parameter ( $\delta$ ) and the Mark-Houwink constants ( $K$  &  $\alpha$ ) of food grade polyvinyl acetate (PVAc). *J. Polym. Biopolym. Phys. Chem.* 2014, 2, 67-72.
- [45] Hübel, H.; Faux, D.A.; Jones, R.B.; Dunstan, D.J. Solvation pressure in chloroform. *J. Chem. Phys.* 2006, 124, 204506-1 - 204506-7.
- [46] Konicek, J.; I. Wadsö, I. Enthalpies of vaporization of organic compounds, *Acta Chem. Scand.* 1970, 24, 2612-2616.
- [47] Chickos, J.S.; Acree Jr., W.E. Enthalpies of vaporization of organic and organometallic compounds 1880-2002. *J. Phys. Chem. Ref. Data* 2003, 32, 519 – 878.
- [48] Hansen, C.M. Hansen solubility Parameters. A user's handbook, 2nd ed.; Publisher: CRC Press, London New York, 2007; pp. 4–6, 13-17, 45-59.
- [59] Deshpande, V.T.; Pathki, K.G. Magnetic susceptibility of acetic acid + pyridine mixtures. *Trans. Faraday Soc.* 1962, 58, 2134-2138.
- [60] Sriraman, S.; Shanmugasundaram, V.; Sabesan, R.; The diamagnetic study of the nature of the association of acetic acid. II. The binary systems of acetic acid with Triethylamine, pyridine and Aniline. *Bull. Chem. Soc. Jpn.* 1965, 38, 1391-1393.
- [61] <https://nmr.chem.umn.edu/ResReports/NMR002.htm>s
- [62] Christian Reichardt C. and Welton T. Solvents and Solvent Effects in Organic Chemistry, 4th ed.; Willey: Weinheim, Germany, 2011; Appendix A, pp 549-553.
- [63] Bruker Almanac 2012; NMR tables p15.
